# Supplementary material for: The novel cardiokine GDF3 predicts adverse fibrotic remodeling post-myocardial infarction
Source: bioRxiv or medRxiv preprint supplement (doi:10.1101/2021.05.31.21257816), 2021-06-01
Supplement: Supplementary file [file media-1.pdf]

# **The novel cardiokine GDF3 predicts adverse fibrotic remodeling post-myocardial infarction**

Nihar Masurkar <sup>a†</sup> PhD, Marion Bouvet <sup>a†</sup> PhD, Damien Logeart <sup>b</sup> MD PhD, Olivier Claude <sup>a</sup> PhD, Maguelonne Roux <sup>c</sup> PhD, Clément Delacroix <sup>a</sup> PhD, Damien Bergerot <sup>d</sup> Msc, Jean-Jacques Mercadier <sup>e</sup> MD PhD, Marc Sirof <sup>b</sup> MD PhD, Barnabas Gellen MD PhD <sup>f</sup>, Marine Livrozet <sup>d</sup> MD PhD, Antoine Fayol <sup>d</sup> MD, Estelle Robidel <sup>a</sup> MsC, David-Alexandre Trégouët <sup>g</sup> PhD, Giovanna Marazzi <sup>a</sup> MD PhD, David Sassoon <sup>a</sup> PhD, Mariana Valente <sup>a</sup> PhD, and Jean-Sébastien Hulot <sup>a,d\*</sup> MD PhD.

## **SUPPLEMENTAL MATERIAL**

**Supplemental Tables : 1**

**Supplemental Figures : 5**

**Supplemental Table 1. PCR primers**

| GENE                | FORWARD PRIMER (5' TO 3') | REVERSE PRIMER (5' TO 3') |
|---------------------|---------------------------|---------------------------|
| <b><i>CCL8</i></b>  | TCTACGCAGTGCTTCTTTGCC     | AAGGGGGATCTTCAGCTTTAGTA   |
| <b><i>PRTN3</i></b> | ATGGCTGGAAGCTACCCATC      | TGCCACCTACAATCTTGGAG      |
| <b>F10</b>          | AGGACTCGGAGGGCAAACCT      | TCACGGACCTCTTCATAAGAACA   |
| <b>SAA3</b>         | TGCCATCATTCTTTGCATCTTGA   | CCGTGAACTTCTGAACAGCCT     |
| <b>APOC4</b>        | TGTTCTTGGTCAGCTTTGTAGC    | AGGCTGTGGGTCTTGTTTAGG     |
| <b>APOC2</b>        | ATGGGGTCTCGGTTCTTCCT      | GTCTTCTGGTACAGGTCTTTGG    |
| <b>PROK2</b>        | TTGCGACAAGGACTCTCAGT      | CCCATAGGTCAGATCCT         |
| <b>CIQTNF3</b>      | GCTGGTAAACATAGGTGGCG      | GCGGTTCTTCATCAGCTTCA      |
| <b>CELA1</b>        | GGGGCTCCTCTGTGAAGAAT      | AGCATACTGACCGTTCACCA      |
| <b>GDF3</b>         | TTCAGCTTCTCCAGACCAG       | CCTTTTCTTTGATGGCAGACAAG   |
| <b>DMKN</b>         | CGGGAGTCACACCTTCATCT      | AACTTCAGCCACTTCAGCAG      |
| <b>NDP</b>          | AGTCTGAGAAGAAGGAGCCC      | GCTTCTTTCACTTGCAACCG      |
| <b>RPL13</b>        | GGGTGGCCAGCTTAAGTTCT      | GAGGAGGCGAAACAAGTCCA      |

**Online Figure 1. Expression of candidates that were not increased in the ischemic heart.** qPCR evaluation of *REG3G*, *F9*, *CFD*, *17007RIK*, *TRH*, *GM26947*, *ADIPOQ*, *PNOG*, *LIPC*, *MUC6*, *MZB1*, and *AMB P* expression in the infarcted area of MI hearts and the corresponding area of sham hearts (N = 3). Statistical significance was determined by Mann-Whitney test, \*P < 0.05, \*\*P < 0.01 and \*\*\*P < 0.001.

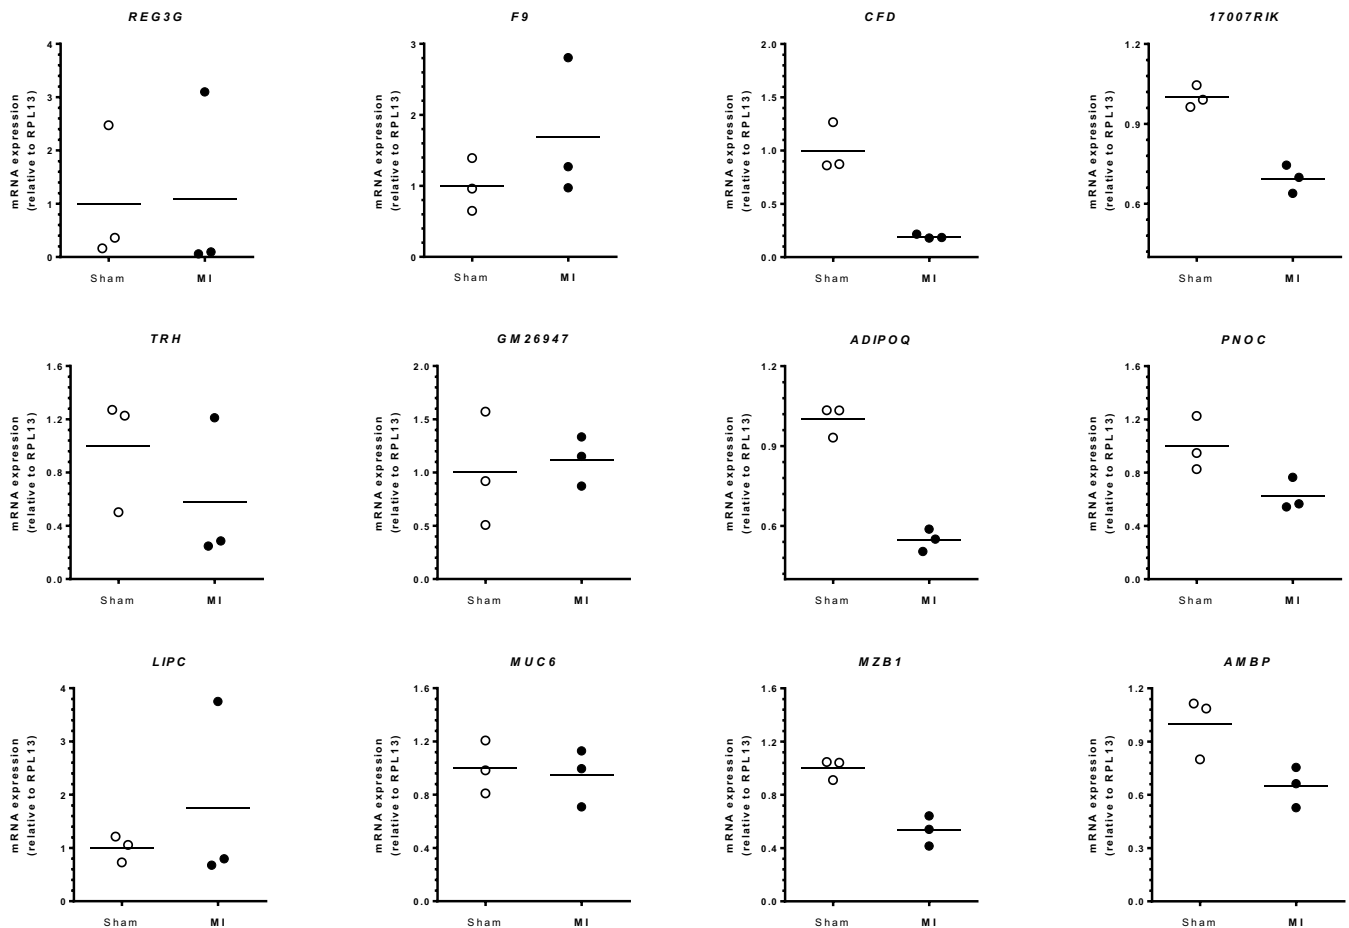

**Online Figure 2. Expression of GDF3 in human hearts.** Representative Western blots and quantification of mature GDF3 in non-failing (NF) (n = 6) and failing hearts (HF) (n = 9) of patients. \*P < 0.05 as determined by Mann Whitney test

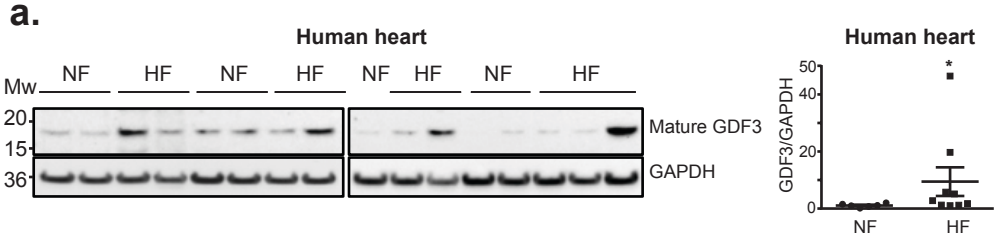

**Online Figure 3. Distribution of plasma GDF3 levels.** GDF3 was measured by ELISA in human plasmas collected at day 4±2 post-PCI.

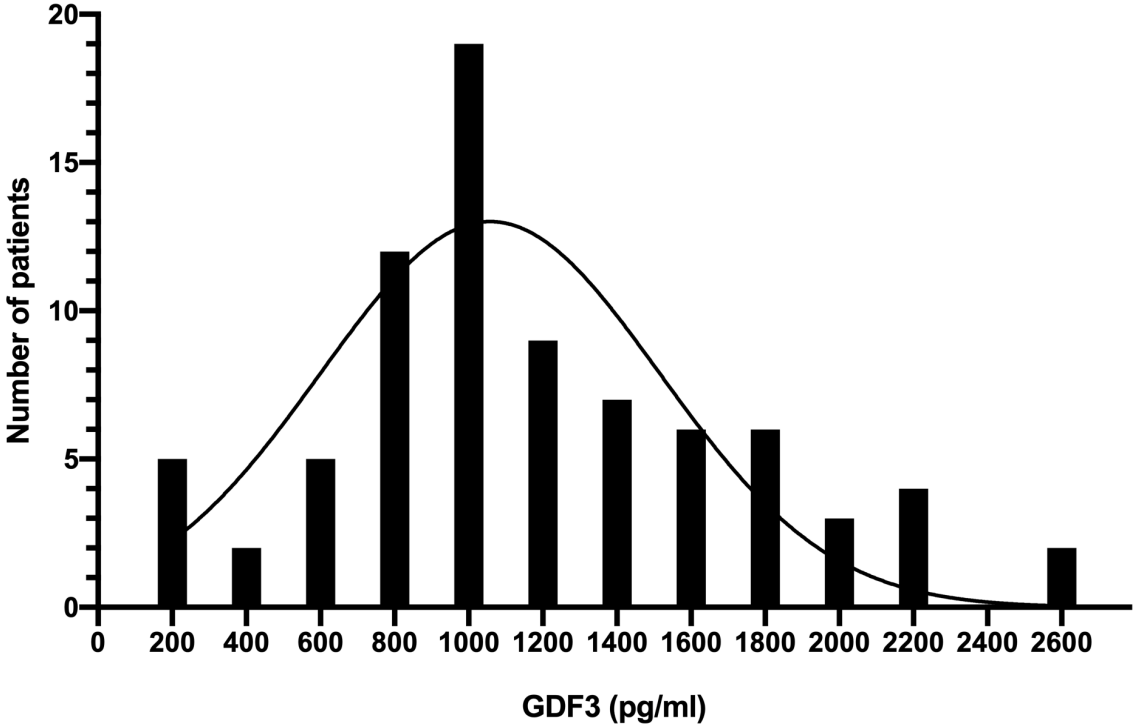

**Online Figure 4. Left ventricular end-diastolic volume indexed for body surface area measured on cardiac MRI 6 months after MI, according to GDF3 quartiles. GDF3 was measured by ELISA in human plasmas collected at day 4±2 post-PCI and patients were classified into 4 quartiles according to GDF3 levels. Statistical significance was determined by one way ANOVA followed by comparison tests, \*P < 0.05**

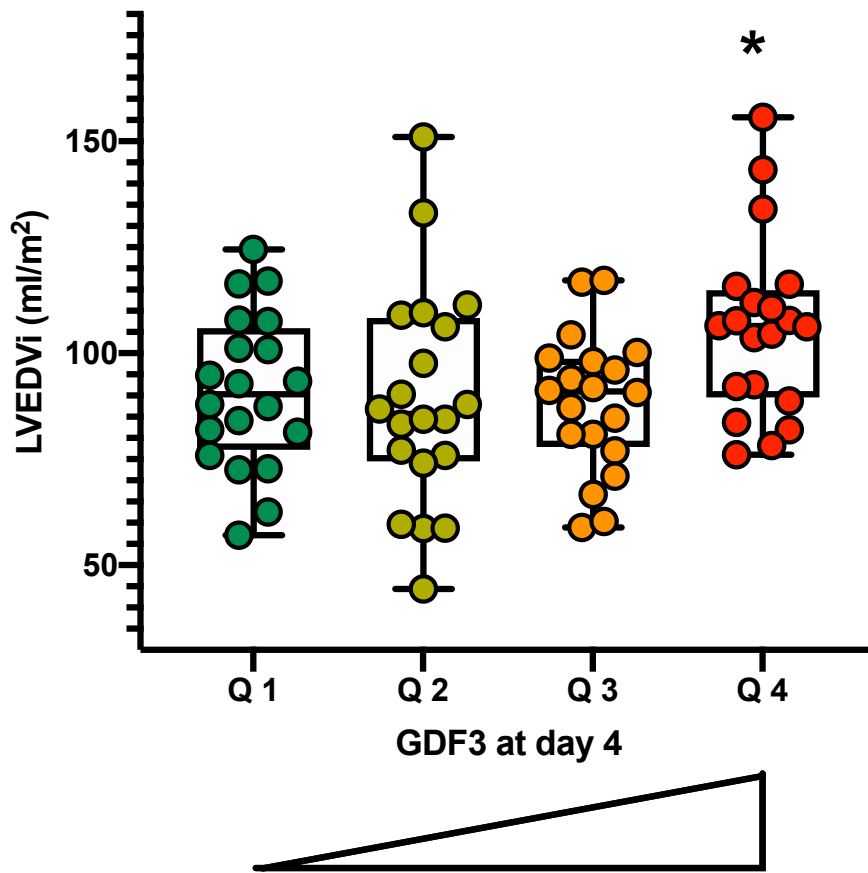

|                                               | GDF3 levels (pg/mL)     |                          |                           |                           |
|-----------------------------------------------|-------------------------|--------------------------|---------------------------|---------------------------|
|                                               | Quartile 1<br>[150-807] | Quartile 2<br>[825-1040] | Quartile 3<br>[1050-1510] | Quartile 4<br>[1550-2570] |
| <b>LVEDVi<br/>(ml/m<sup>2</sup>)<br/>Mean</b> | 91.0                    | 89.1                     | 88.3                      | 105.9                     |
| <b>SD</b>                                     | 18.2                    | 25.9                     | 16.3                      | 20.9                      |

**Online Figure 5. Left ventricular ejection fraction measured on cardiac MRI 6 months after MI, according to GDF3 quartiles.** GDF3 was measured by ELISA in human plasmas collected at day 4±2 post-PCI and patients were classified into 4 quartiles according to GDF3 levels. Statistical significance was determined by one way ANOVA followed by comparison tests, \*P < 0.05

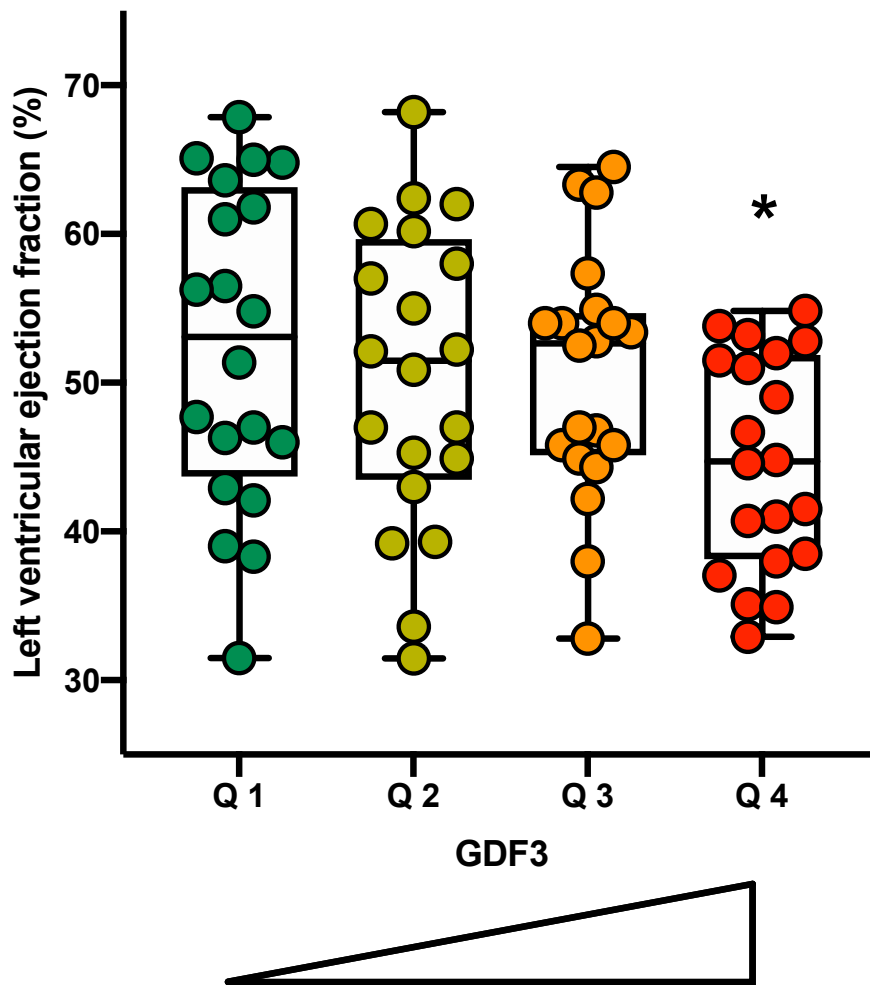

|                 | GDF3 levels (pg/mL)     |                          |                           |                           |
|-----------------|-------------------------|--------------------------|---------------------------|---------------------------|
|                 | Quartile 1<br>[150-807] | Quartile 2<br>[825-1040] | Quartile 3<br>[1050-1510] | Quartile 4<br>[1550-2570] |
| <b>LVEF (%)</b> |                         |                          |                           |                           |
| <b>Mean</b>     | 52.4                    | 50.5                     | 50.6                      | 44.7                      |
| <b>SD</b>       | 10.7                    | 10.1                     | 8.3                       | 7.2                       |
